# Supplementary material
Source: PubMed Central journal article supplement (PMC8319097)
Supplement: NIHMS1708201-supplement-1.pdf [file NIHMS1708201-supplement-1.pdf]

## Supplemental Information

*Supplemental Table S1. Cognitive variable factor structure.* Measurement models of all cognitive variables of interest as either a one-factor solution or as a two-factor solution (executive function tests and processing speed tests as separate constructs). The 2-factor solution fit the data significantly better than a 1-factor solution (via a chi-square difference test  $\chi^2[9] = 103.006, p < .00001$ .)

| Model Fit Parameters                          | 1-Factor        | 2-Factor        |
|-----------------------------------------------|-----------------|-----------------|
| <b>Akaike Information Criterion (AIC)</b>     | <b>4208.56</b>  | <b>4123.554</b> |
| <b>Bayesian Information Criterion (BIC)</b>   | <b>4305.008</b> | <b>4248.936</b> |
| <b>Root Mean Square Error</b>                 | <b>0.162</b>    | <b>0.126</b>    |
| <b>Comparative Fit Index (CFI)</b>            | <b>0.861</b>    | <b>0.938</b>    |
| <b>Tucker-Lewis Index (TLI)</b>               | <b>0.822</b>    | <b>0.893</b>    |
| <b>Standardized Root Mean Square Residual</b> | <b>0.058</b>    | <b>0.038</b>    |
| <b>Chi-Square Test of Model Fit</b>           | <b>204.463</b>  | <b>101.457</b>  |

*Supplemental Table S2. Alternative model 2 fit parameters.* Two separate specifications of the original “Model 2” were tested to compare the fit parameters when executive function and processing speed were separated and covarying with each other (EF/PS) and for when these measures were modeled as a single cognitive latent (COG). While both models demonstrate excellent fit parameters, the EF/PS specification demonstrated a slight improvement over the COG model in many of the most commonly referenced fit indices. Additionally, the EF/PS model fits the data significantly better using a chi-square difference test  $\chi^2[5] = 20.431, p = .001037$ .

| Model Fit Parameter                           | EF/PS          | COG            |
|-----------------------------------------------|----------------|----------------|
| <b>Akaike Information Criterion (AIC)</b>     | <b>5016.41</b> | <b>5026.84</b> |
| <b>Bayesian Information Criterion (BIC)</b>   | <b>5209.31</b> | <b>5203.67</b> |
| <b>Root Mean Square Error</b>                 | <b>0.047</b>   | <b>0.055</b>   |
| <b>Comparative Fit Index (CFI)</b>            | <b>0.982</b>   | <b>0.974</b>   |
| <b>Tucker-Lewis Index (TLI)</b>               | <b>0.974</b>   | <b>0.965</b>   |
| <b>Standardized Root Mean Square Residual</b> | <b>0.03</b>    | <b>0.036</b>   |
| <b>Chi-Square Test of Model Fit</b>           | <b>116.999</b> | <b>137.431</b> |
